# Supplementary figures and images for: Occurrence and Genomic Characterization of mcr-1-Harboring Escherichia coli Isolates from Chicken and Pig Farms in Lima, Peru
Source: MDPI journal article supplement (doi:10.3390/antibiotics11121781), 2022-12-08

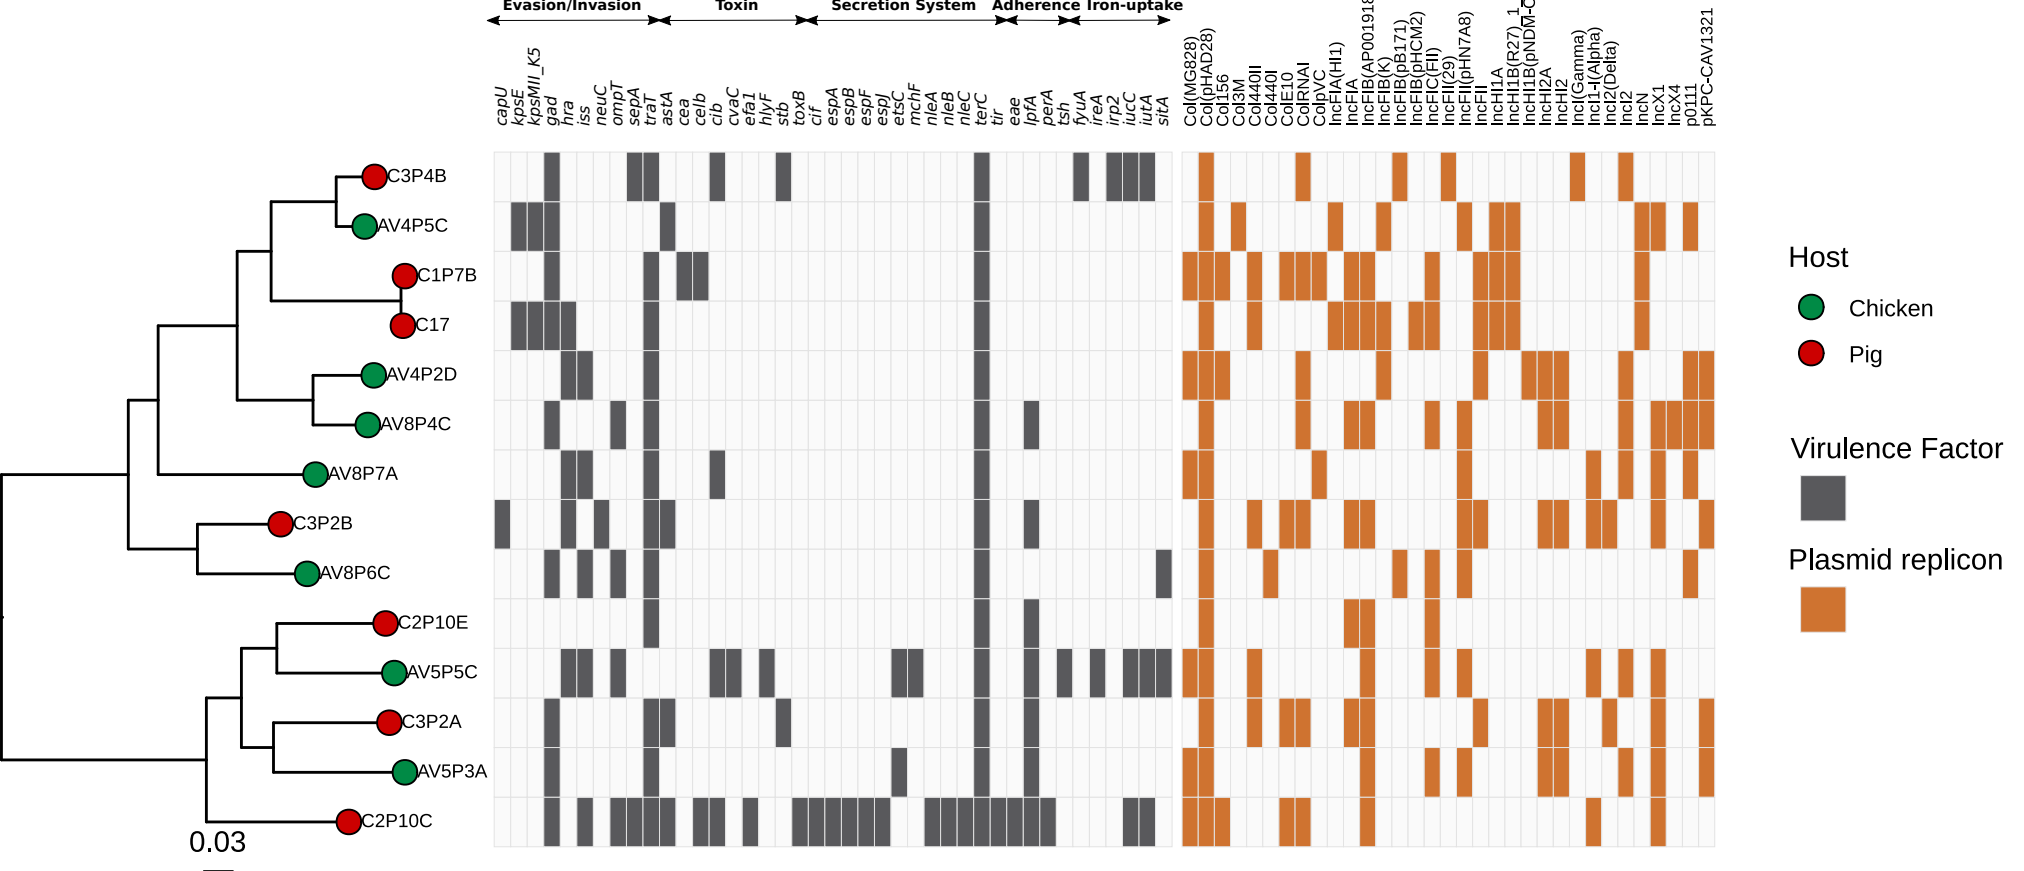

Supplement: s1 [file s1]

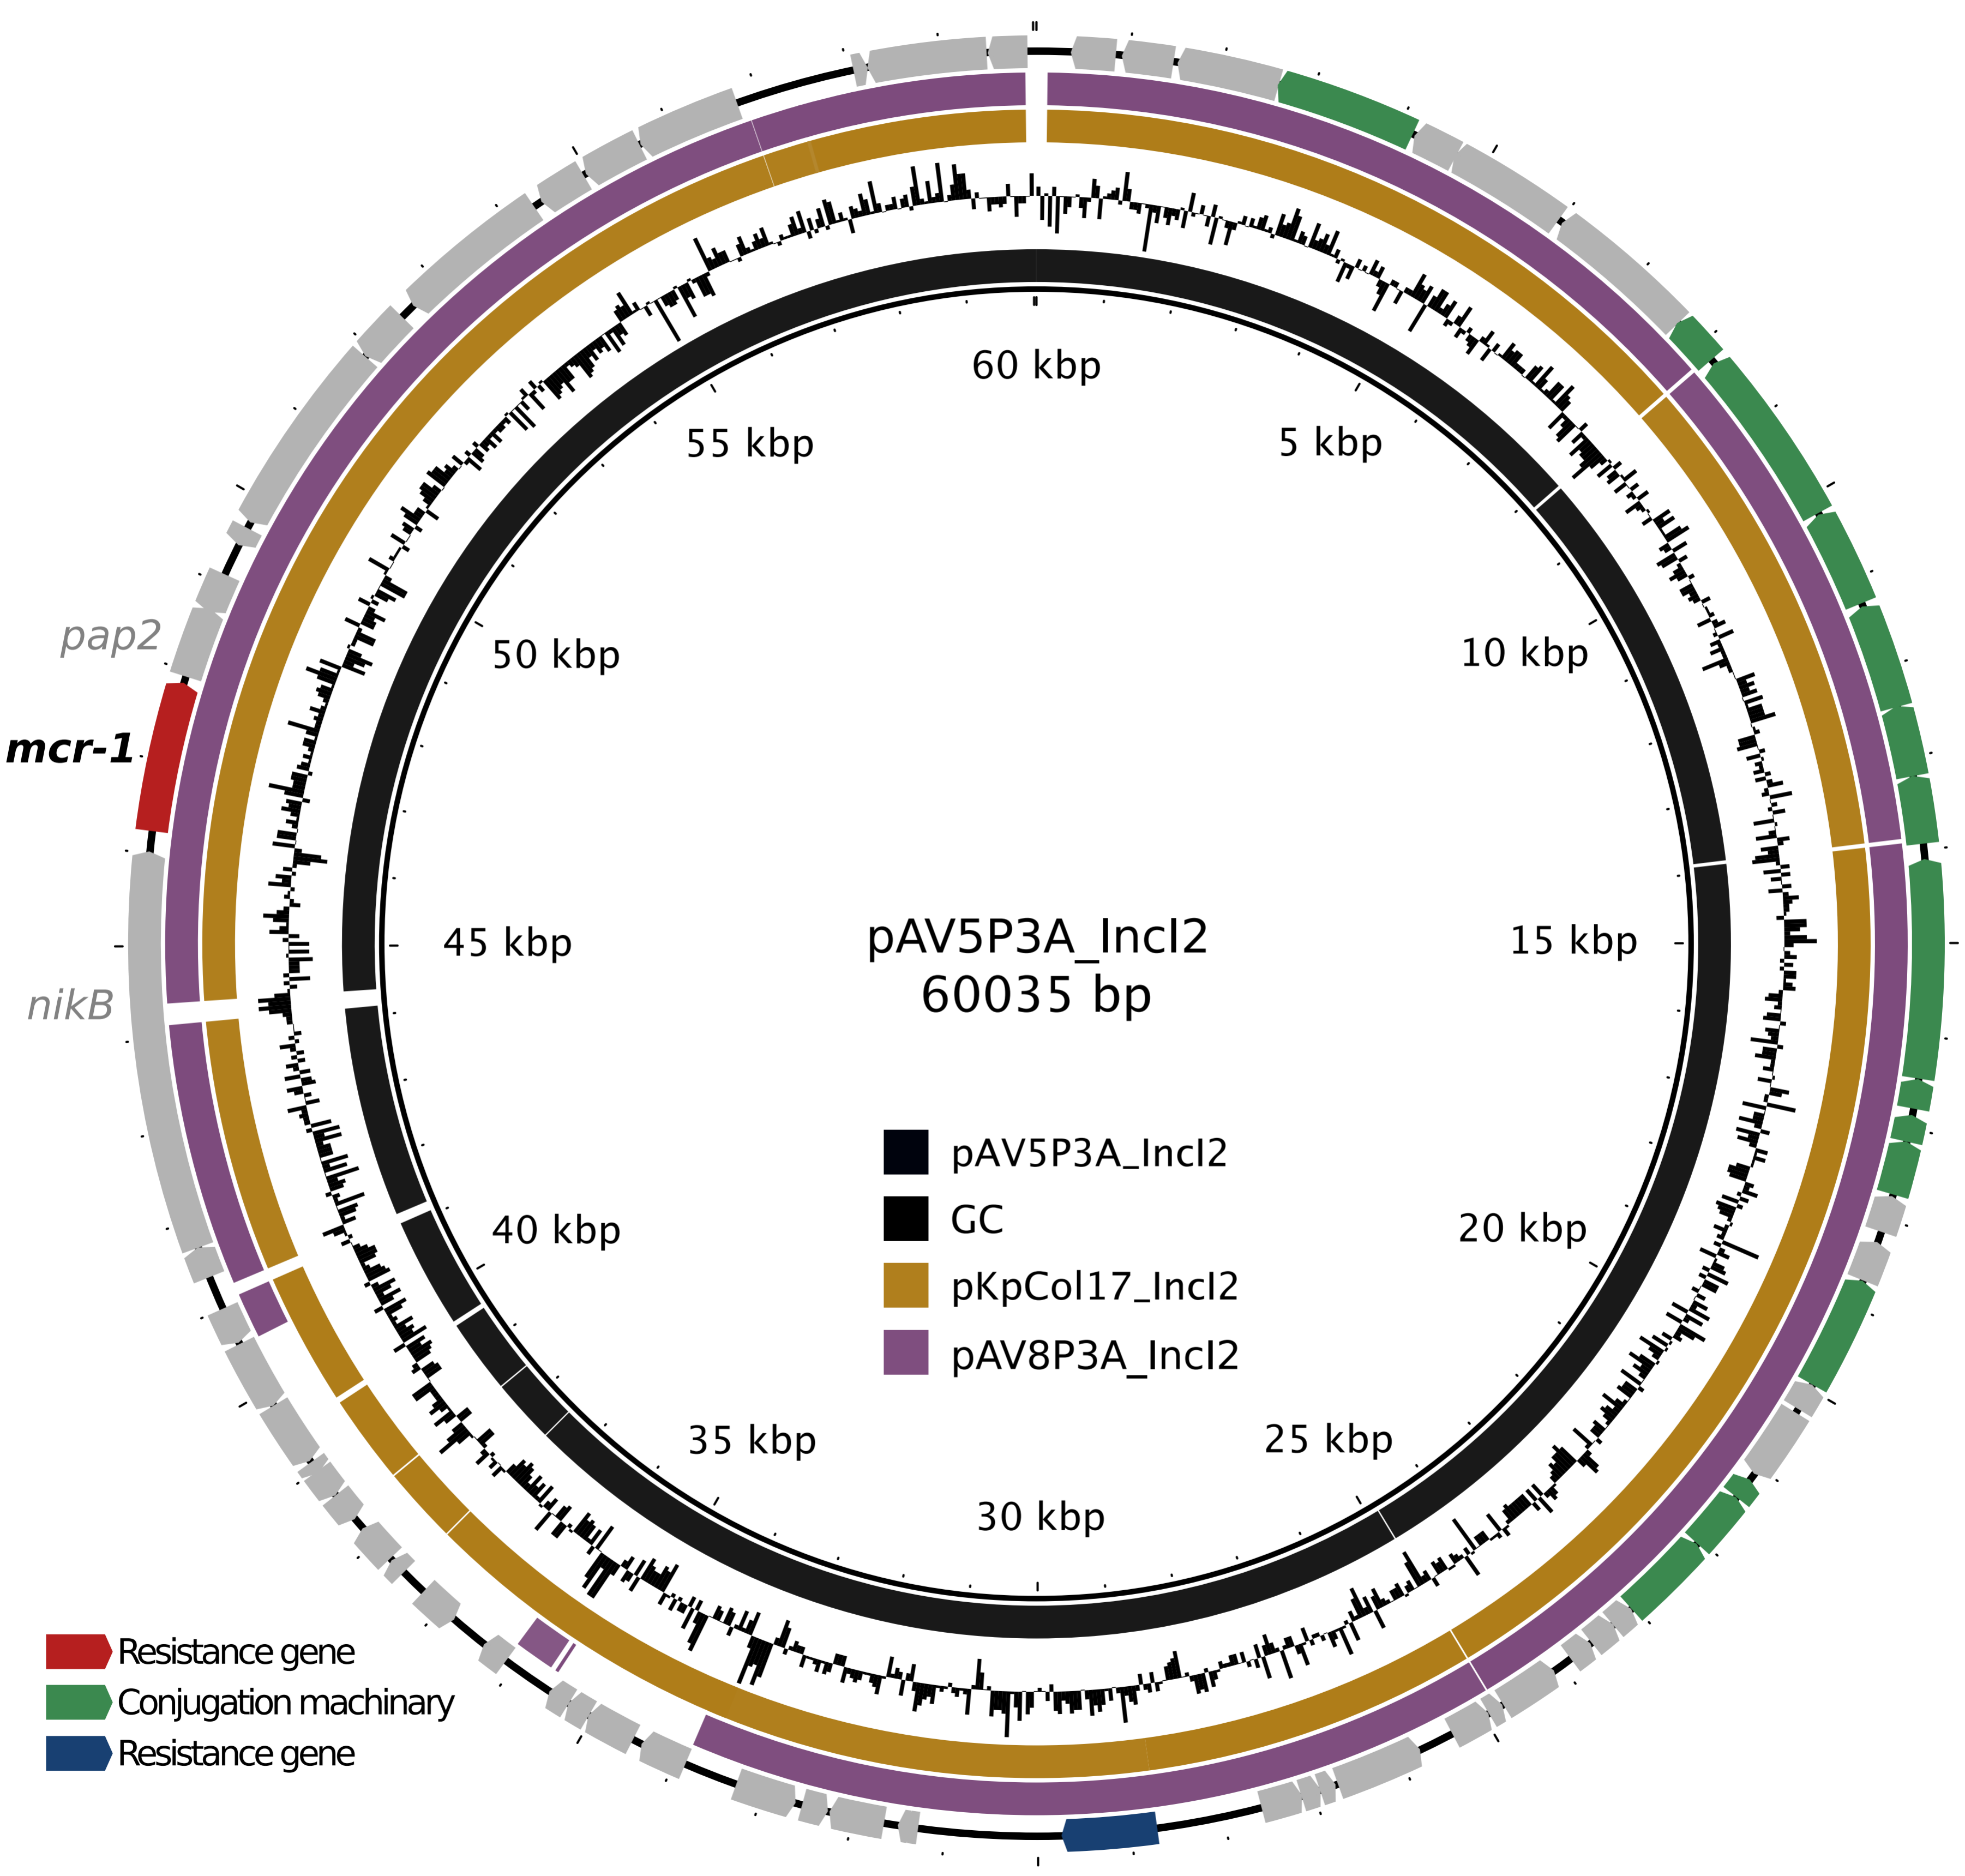

Supplement: s1 [file s1]
